# Supplementary material for: Spatial variance of spring phenology in temperate deciduous forests is constrained by background climatic conditions
Source: PubMed Central journal article supplement (PMC6879605; doi:10.1038/s41467-019-13365-1), 2019-11-26
Supplement: 41467_2019_13365_MOESM1_ESM.pdf [file 41467_2019_13365_MOESM1_ESM.pdf]

**Spatial variance of spring phenology in temperate deciduous forests is constrained by background climatic conditions**

Peaucelle et al.

Supplementary Figures and Tables.

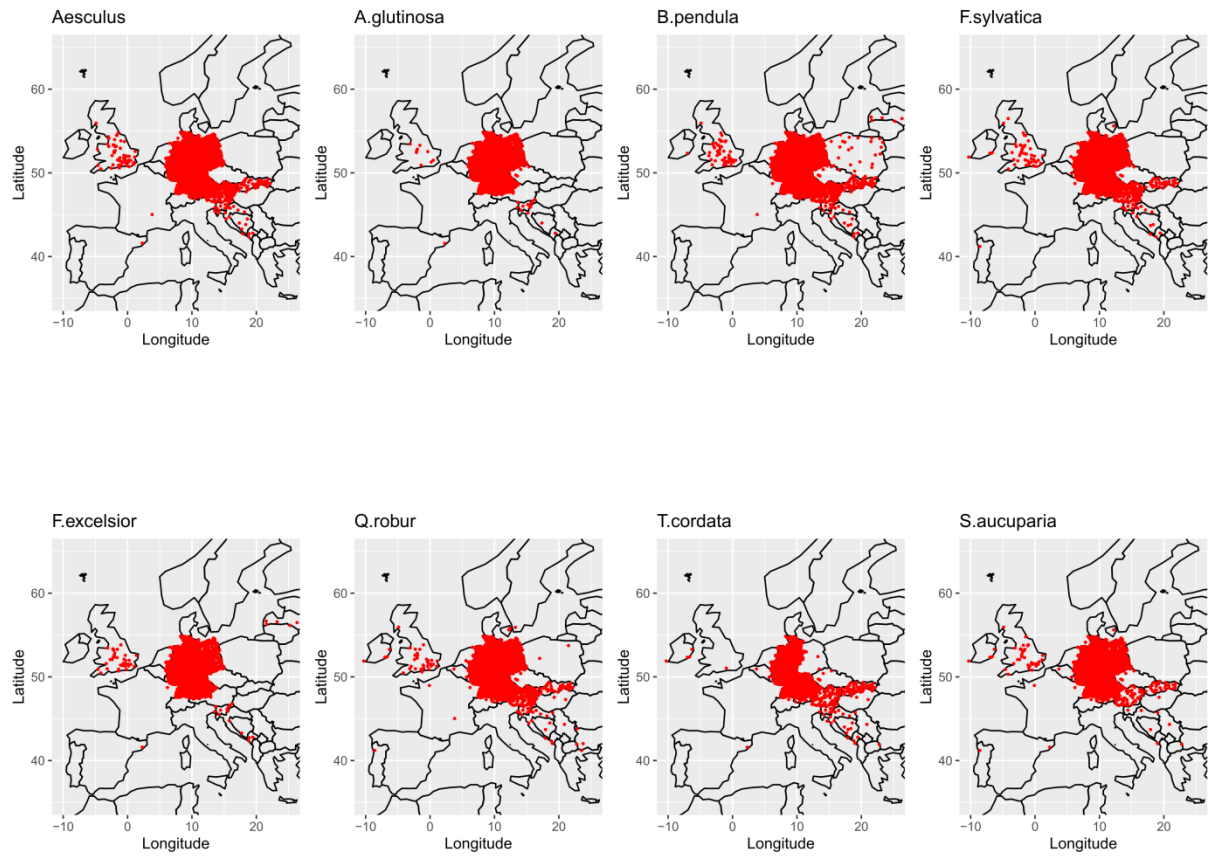

**Supplementary Figure 1** | Distribution of sites for each species: *Aesculus hippocastanum*, *Alnus glutinosa*, *Betula pendula*, *Fagus sylvatica*, *Fraxinus excelsior*, *Quercus robur*, *Tilia cordata* and *Sorbus aucuparia*.

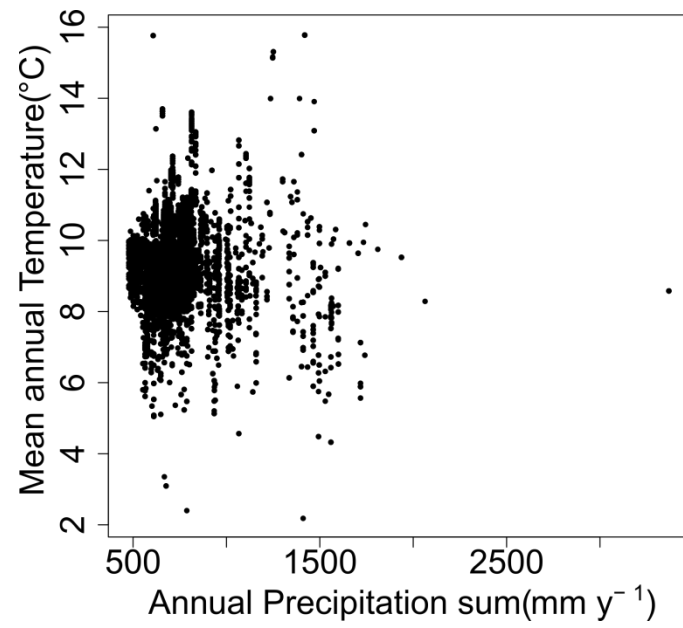

**Supplementary Figure 2** | Site distribution along long-term (1970-2016) mean annual temperature and annual precipitation sum estimated with CRU-NCEP. Source data are provided as a Source Data file.

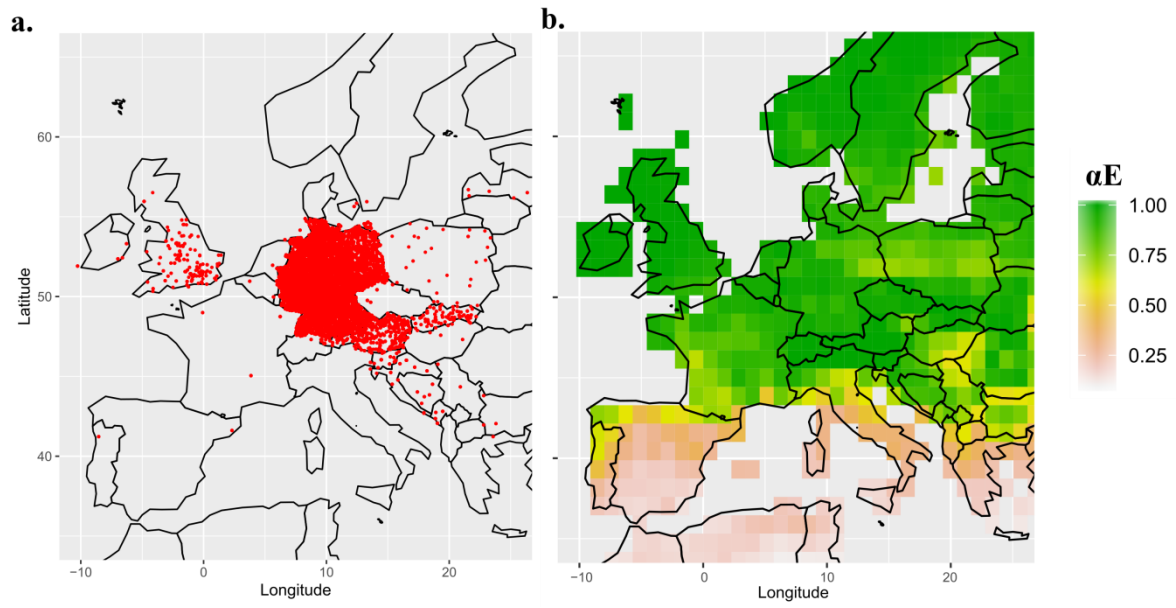

**Supplementary Figure 3 | a.** Spatial distribution of all sites over Europe (red dots) . **b.** Long-term average of the actual to potential evapotranspiration ratio  $\alpha E$ .

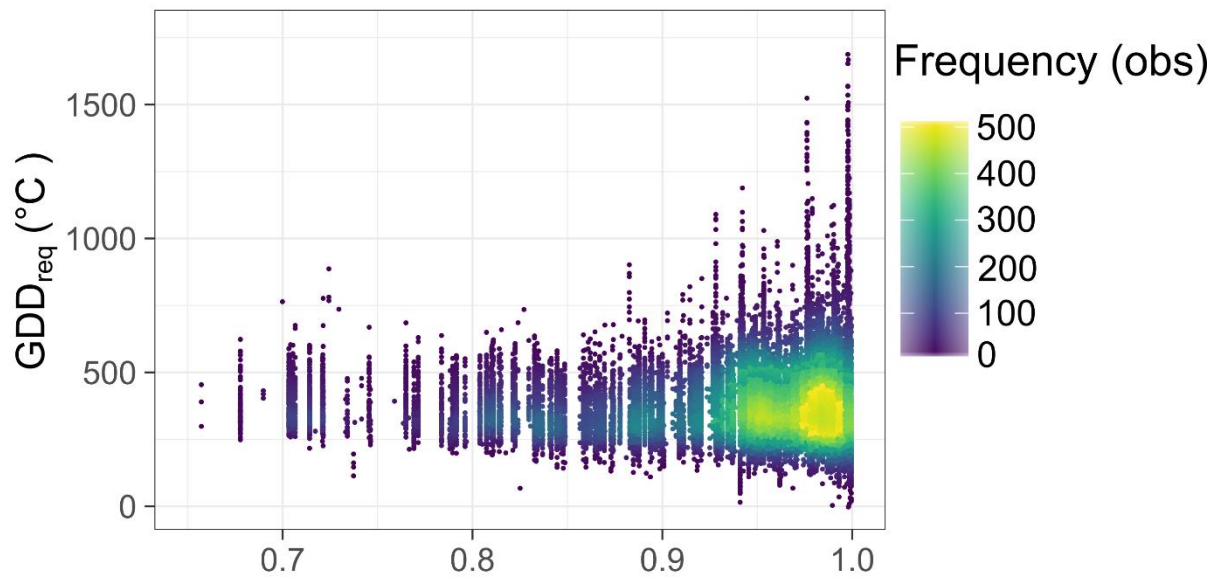

**Supplementary Figure 4** | Distribution (all sites and species) of the long-term (1970-2016) heat requirement ( $GDD_{req}$ , estimated as the sum of temperatures  $>5$  °C between 1 January and the LU date) as a function of the ratio of actual to potential evapotranspiration ( $\alpha E$ ). Low  $\alpha E$  values indicate drought conditions during the growing season. The gradient color represents the density of observations. Source data are provided as a Source Data file.

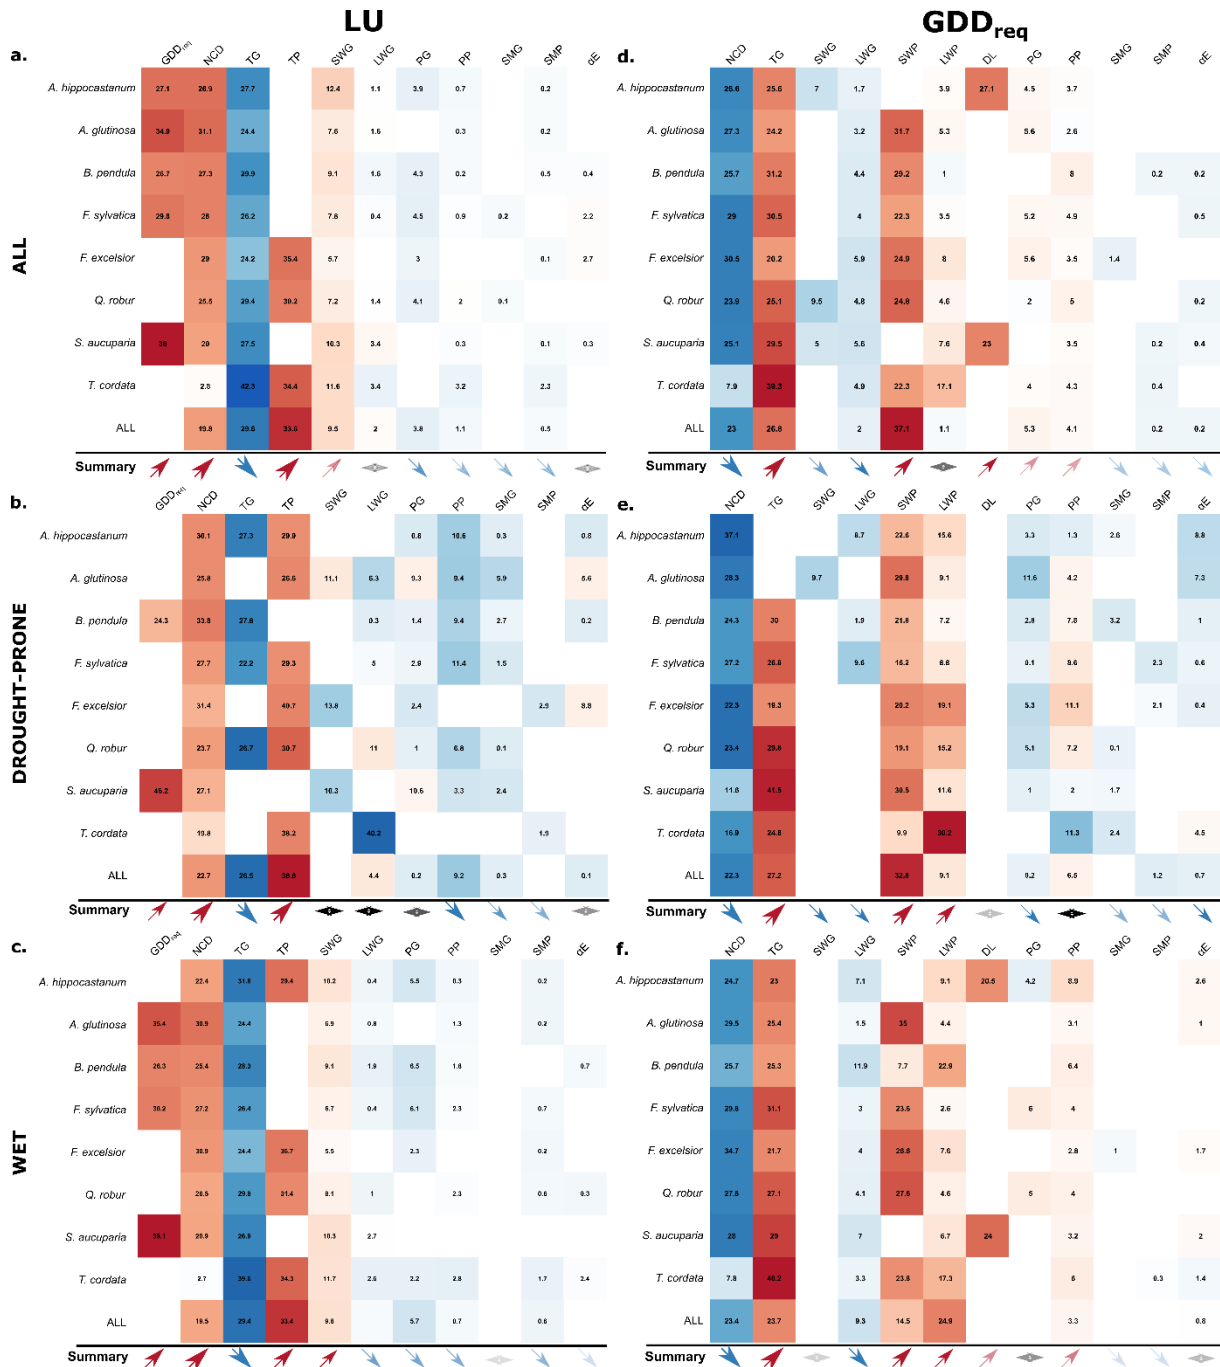

**Supplementary Figure 5 | Relative importance of each variable (in percentage) in explaining leaf unfolding date (LU) and corresponding heat requirement (GDD<sub>req</sub>, estimated as the sum of temperatures >5 °C between 1 January and the LU date) for each species considering a-d) all sites, b-e) only drought prone sites and c-f) wet sites. Red colors indicate a positive correlation, while blue colors indicate a negative correlation. Color intensity reflects variable relative importance. Blanks represent variables that were discarded during the predictors selection. See Supplementary Table 2 for the description of each variable. The direction and importance of correlations among species is summarized by the size and color of arrows at the bottom of each panel. A double black arrow means that the direction of the response is species dependent. Refers to Supplementary Tables 5-10 in appendix for a complete description of correlation coefficients.**

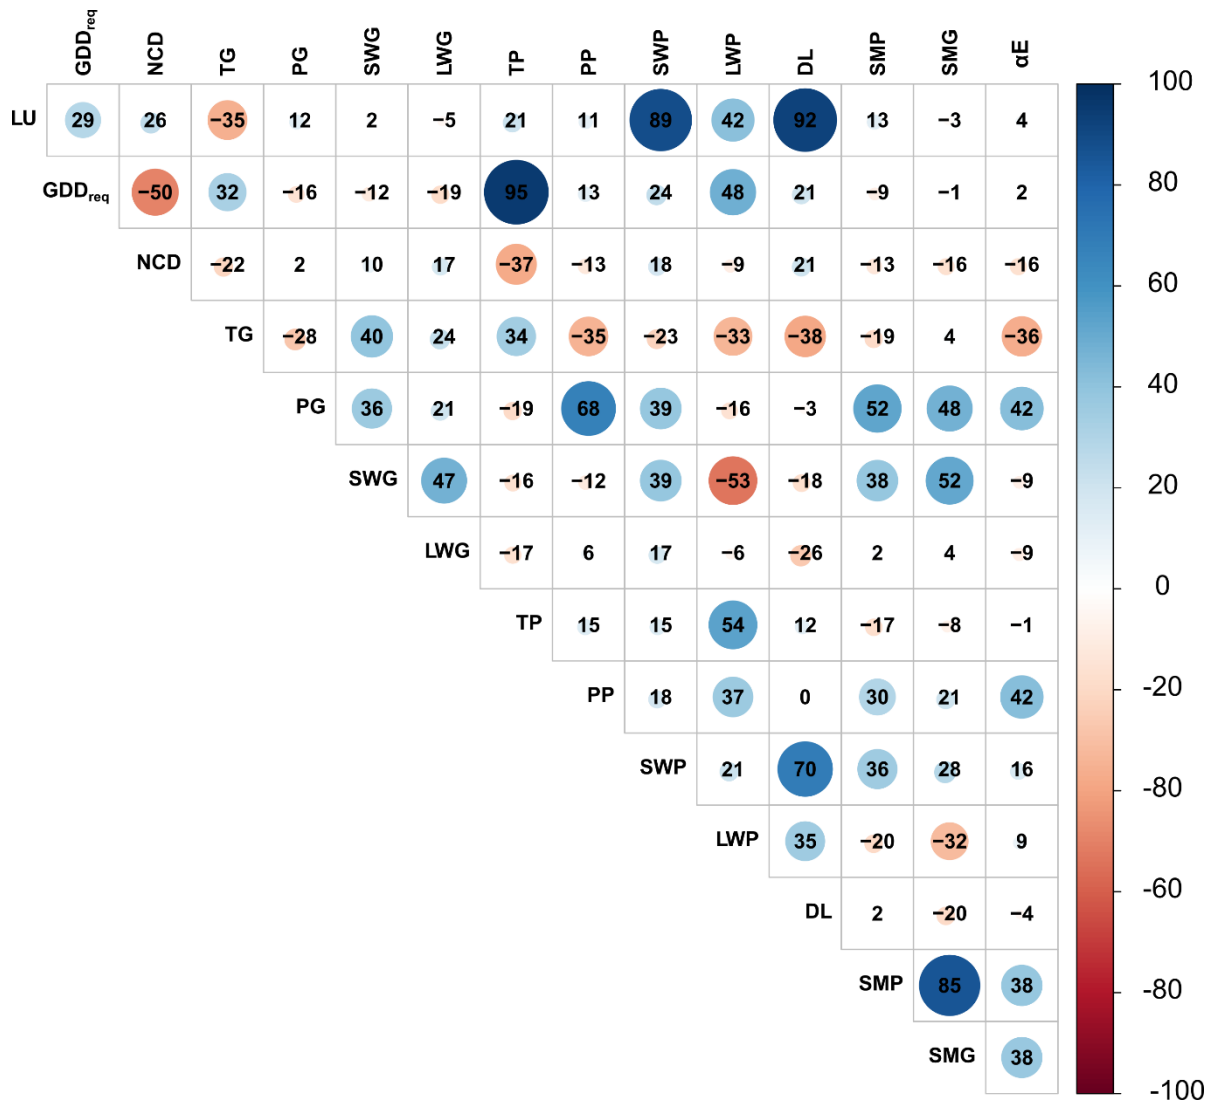

**Supplementary Figure 6** | Pearson correlation coefficient (in %) between predictors. GDD<sub>req</sub>, growing degree day estimated as the sum of daily temperature above 5°C from the 1 January to leaf unfolding (LU). NCD, number of chilling days estimated as the number of days between 1 November in the previous year and the LU date with temperatures between 0 and 5 °C; TG, mean growing-season temperature; TP, mean pre-season temperature; SWG, mean growing-season shortwave [visible and near infrared] radiation; LWG, mean growing-season longwave [infrared] radiation; SWP, mean pre-season shortwave [visible and near infrared] radiation; LWP, mean pre-season longwave [infrared] radiation; PG growing-season total precipitation; PP, pre-season total precipitation; DL, day length at LU date; SMP, pre-season soil-moisture content; SMG, growing season soil-moisture content; αE, ratio of actual to potential evapotranspiration.

**Supplementary Figure 7** | Semi-variograms of the standardized residuals of LU (as a function of site distance in km) before and after correction for spatial auto-correlation. Data (all sites) for *A.hippocastanum*, *A. glutinosa*, *B. pendula* and *F.sylvatica*.

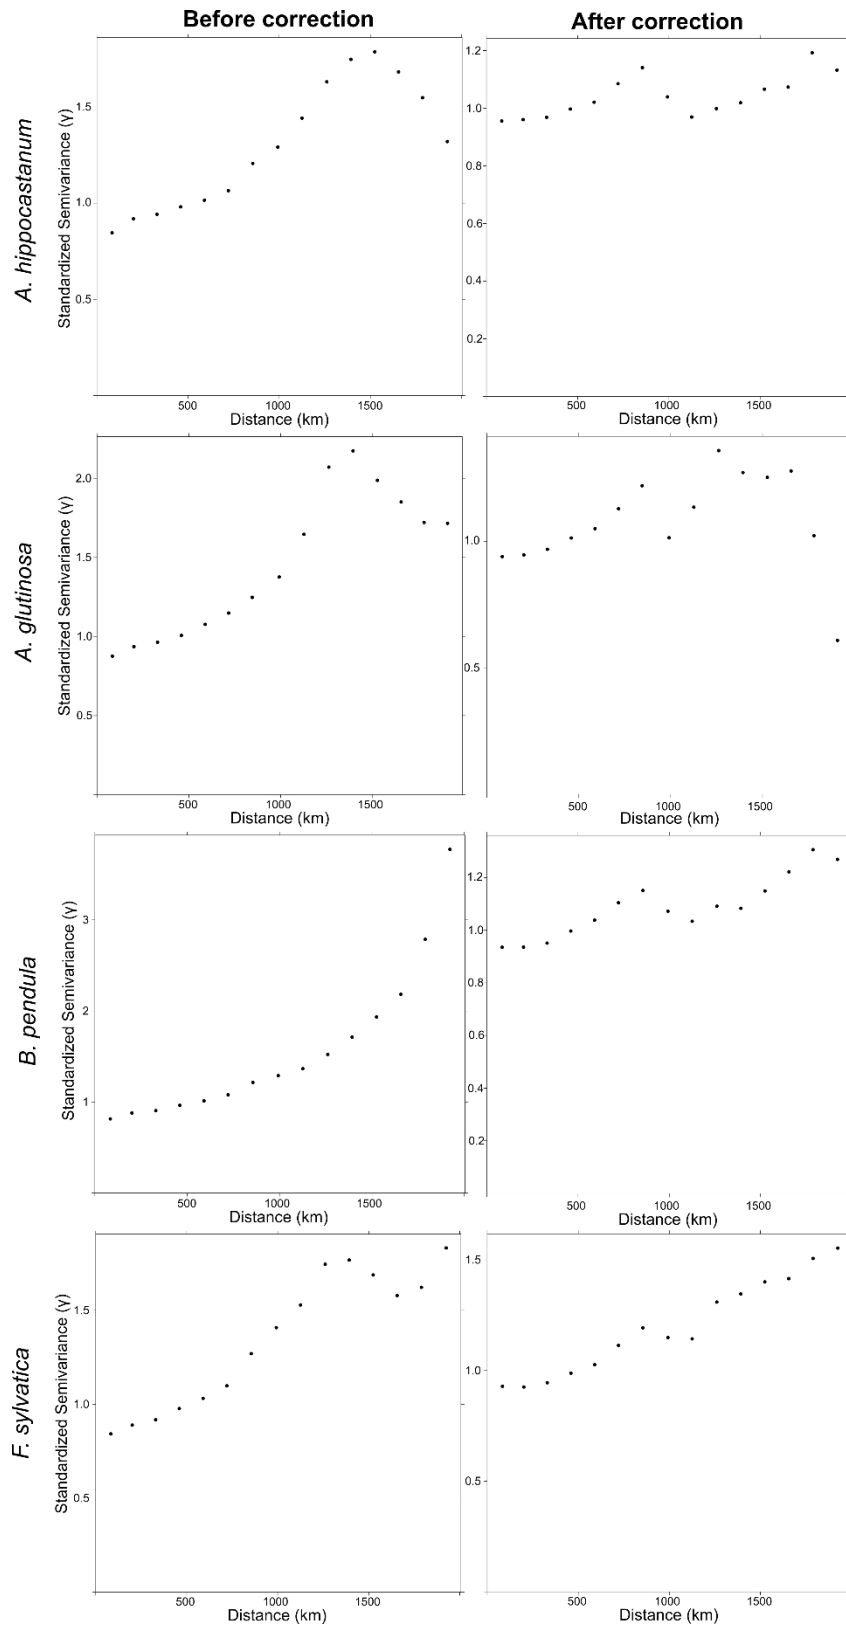



**Supplementary Figure 8** | Semi-variograms of standardized residuals for LU (as a function of site distance in km) before and after correction for spatial auto-correlation. Data (all sites) for *F.excelsior*, *Q. robur*, *S. aucuparia* and *T.cordata*.

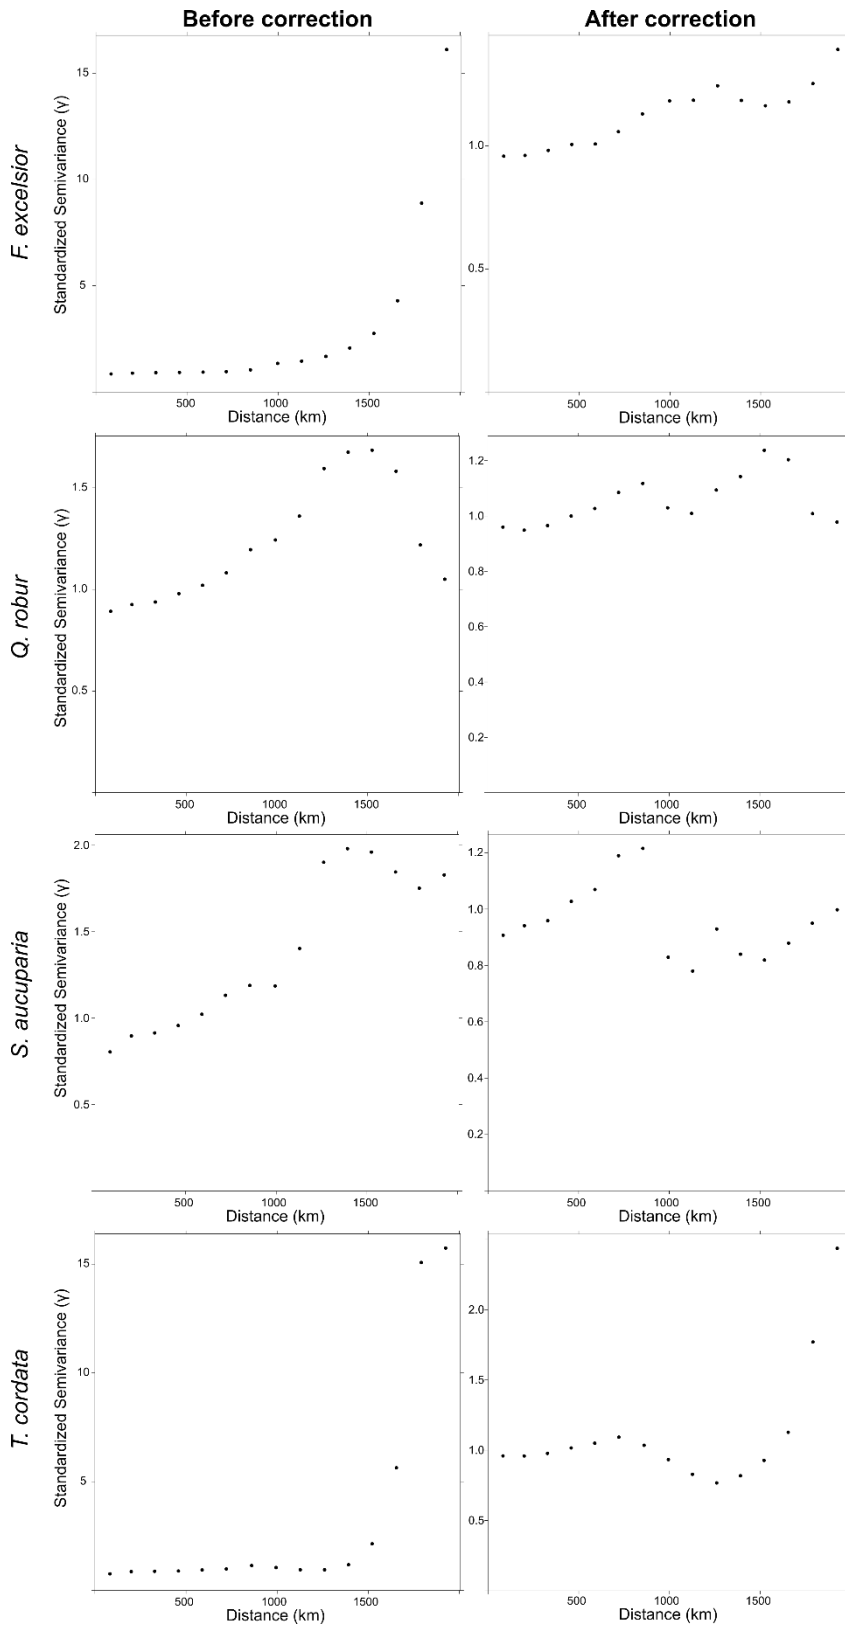

**Supplementary Figure 9** | Semi-variograms of standardized residuals for LU (as a function of site distance in km) before and after correction for spatial auto-correlation. Data for all sites and all species pooled together.

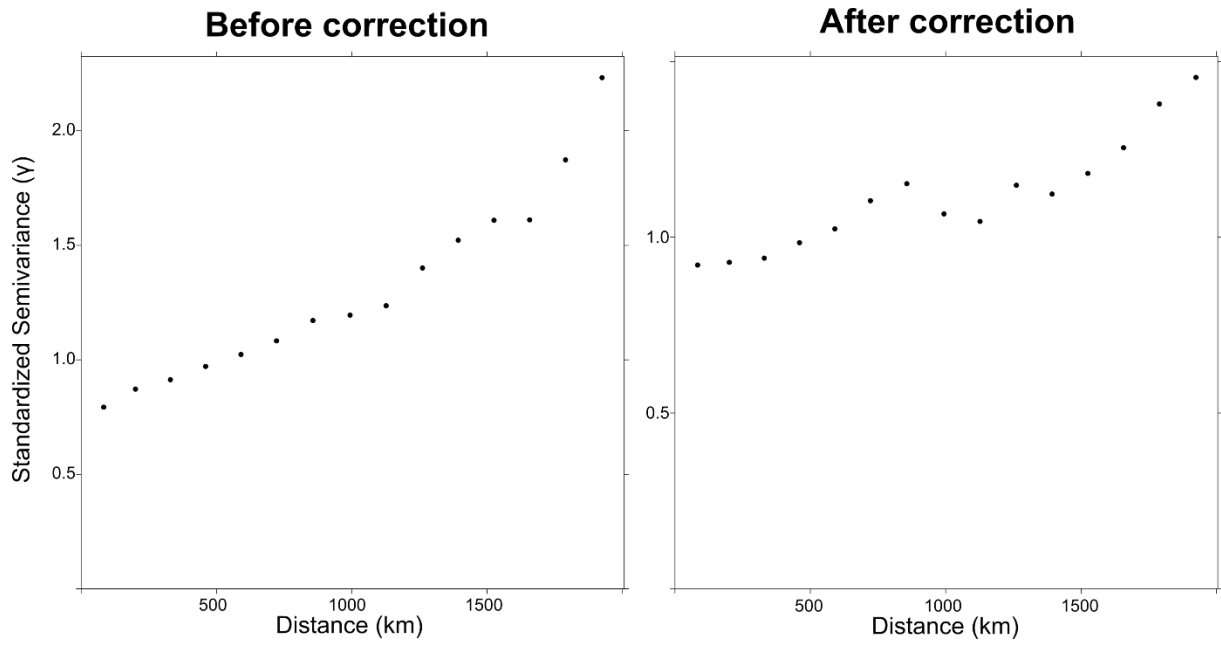

**Supplementary Table 1** | Description of environmental variables and data source.

| <b>Variable</b> | <b>Description</b>                                                                                   | <b>Units</b>       | <b>Data source</b>                                                                         |
|-----------------|------------------------------------------------------------------------------------------------------|--------------------|--------------------------------------------------------------------------------------------|
| TG, TP          | Long-term growing and preseason average of temperature                                               | °C                 | CRUN-NCEP                                                                                  |
| PG, PP          | Long-term growing and preseason sum of precipitation                                                 | mm                 | CRUN-NCEP                                                                                  |
| SWG,<br>SWP     | Long-term growing and preseason average of incoming shortwave radiations (visible and near infrared) | W m <sup>-2</sup>  | CRUN-NCEP                                                                                  |
| LWG;<br>LWP     | Long-term growing and preseason average of incoming longwave radiations (infrared)                   | W m <sup>-2</sup>  | CRUN-NCEP                                                                                  |
| DL              | Long-term day length                                                                                 | h                  | Calculated with the geosphere <sup>56</sup> package                                        |
| SMG,SMP         | Long-term growing and preseason soil moisture between 10 and 40 cm depth                             | Kg m <sup>-2</sup> | GLDAS<br><a href="https://ldas.gsfc.nasa.gov/gldas/">https://ldas.gsfc.nasa.gov/gldas/</a> |
| αE              | Long-term ratio of actual to potential evapotranspiration                                            | unitless           | Calculated with the SPLASH <sup>40</sup> model                                             |

**Supplementary Table 2** | Regression coefficients (standard deviation) and p value of generalized least square regression results for leaf unfolding dates for all sites. R<sup>2</sup> and RMSE represent the coefficient of determination and the root mean square error of simulated versus observed leaf unfolding dates, respectively. Bold values indicate significant result with p < 0.1.

|                      | <b>GDD<sub>req</sub></b> | <b>NCD</b>    | <b>TG</b>          | <b>TP</b>     | <b>SWG</b>    | <b>LWG</b>    | <b>PG</b>     | <b>PP</b>     | <b>SMG</b> | <b>SMP</b>    | <b>αE</b>     | <b>R<sup>2</sup></b> | <b>RMSE</b> |
|----------------------|--------------------------|---------------|--------------------|---------------|---------------|---------------|---------------|---------------|------------|---------------|---------------|----------------------|-------------|
| <b>A.</b>            | <b>5.73</b>              | <b>5.67</b>   | <b>-5.8</b>        |               | <b>2.6</b>    | 0.24          | <b>-0.83</b>  | -0.14         |            | 0.03          | -0.01         | 0.66                 | 5.14        |
| <i>hippocastanum</i> | <b>(0.09)</b>            | <b>(0.1)</b>  | <b>(0.12)</b>      |               | <b>(0.32)</b> | (0.24)        | <b>(0.28)</b> | (0.17)        |            | (0.12)        | (0.18)        |                      |             |
| P value              | <1e-10                   | <1e-10        | <1e-10             |               | <1e-10        | 0.32          | 3.7e-3        | 0.39          |            | 0.78          | 0.95          |                      |             |
| <i>A. glutinosa</i>  | <b>6.54</b>              | <b>5.83</b>   | <b>-4.57</b>       |               | <b>1.43</b>   | 0.30          |               | -0.06         |            | 0.03          |               | 0.64                 | 5.21        |
|                      | <b>(0.11)</b>            | <b>(0.12)</b> | <b>(0.15)</b>      |               | <b>(0.36)</b> | (0.20)        |               | (0.15)        |            | (0.15)        |               |                      |             |
| P value              | <1e-10                   | <1e-10        | <1e-10             |               | 7.8e-5        | 0.14          |               | 0.7           |            | 0.85          |               |                      |             |
| <i>B. pendula</i>    | <b>5.13</b>              | <b>5.24</b>   | <b>-5.74</b>       |               | <b>1.75</b>   | -0.31         | <b>-0.83</b>  | -0.05         |            | 0.09          | 0.08          | 0.55                 | 5.21        |
|                      | <b>(0.09)</b>            | <b>(0.09)</b> | <b>(0.11)</b>      |               | <b>(0.36)</b> | (0.29)        | <b>(0.29)</b> | (0.17)        |            | (0.12)        | (0.17)        |                      |             |
| P value              | <1e-10                   | <1e-10        | <1e-10             |               | 1.3e-6        | 0.28          | 4.7e-3        | 0.78          |            | 0.46          | 0.63          |                      |             |
| <i>F. sylvatica</i>  | <b>5.52</b>              | <b>5.19</b>   | <b>-4.86</b>       |               | <b>1.44</b>   | 0.07          | <b>-0.83</b>  | 0.18          | -0.04      |               | <b>0.4</b>    | 0.51                 | 8.29        |
|                      | <b>(0.11)</b>            | <b>(0.11)</b> | <b>(0.12)</b>      |               | <b>(0.37)</b> | (0.27)        | <b>(0.27)</b> | (0.15)        | (0.16)     |               | <b>(0.16)</b> |                      |             |
| P value              | <1e-10                   | <1e-10        | <1e-10             |               | 8.2e-5        | 0.79          | 2.4e-3        | 0.24          | 0.78       |               | 1.4e-2        |                      |             |
| <i>F. excelsior</i>  |                          | <b>4.6</b>    | <b>-3.84</b>       | <b>5.6</b>    | <b>0.9</b>    |               | <b>-0.48</b>  |               |            | 0.02          | <b>0.4</b>    | 0.65                 | 12.68       |
|                      |                          | <b>(0.11)</b> | <b>(0.13)</b>      | <b>(0.09)</b> | <b>(0.39)</b> |               | <b>(0.22)</b> |               |            | (0.14)        | <b>(0.18)</b> |                      |             |
| P value              |                          | <1e-10        | <1e-10             | <1e-10        | 2.1e-2        |               | 3.1e-2        |               |            | 0.9           | 1.7e-2        |                      |             |
| <i>Q. robur</i>      |                          | <b>4.48</b>   | <b>-5.15 (0.1)</b> | <b>5.3</b>    | <b>1.26</b>   | 0.25(0.25)    | <b>-0.73</b>  | <b>0.35</b>   | -0.02      |               |               | 0.66                 | 8.11        |
|                      |                          | <b>(0.09)</b> |                    | <b>(0.08)</b> | <b>(0.34)</b> |               | <b>(0.26)</b> | <b>(0.14)</b> | (0.15)     |               |               |                      |             |
| P value              |                          | <1e-10        | <1e-10             | <1e-10        | 2.3e-4        | 0.32          | 4.7e-3        | 1.4e-2        | 0.89       |               |               |                      |             |
| <i>S. aucuparia</i>  | <b>8.12</b>              | <b>4.3</b>    | <b>-5.87</b>       |               | <b>2.2</b>    | <b>0.73</b>   |               | 0.07          |            | 0.03          | 0.06          | 0.5                  | 7           |
|                      | <b>(0.17)</b>            | <b>(0.17)</b> | <b>(0.15)</b>      |               | <b>(0.44)</b> | <b>(0.33)</b> |               | (0.16)        |            | (0.17)        | (0.23)        |                      |             |
| P value              | <1e-10                   | <1e-10        | <1e-10             |               | 6.2e-7        | 2.7e-2        |               | 0.67          |            | 0.86          | 0.79          |                      |             |
| <i>T. cordata</i>    |                          | <b>0.51</b>   | <b>-7.73</b>       | <b>6.29</b>   | <b>2.12</b>   | <b>-0.63</b>  |               | <b>-0.58</b>  |            | <b>-0.42</b>  |               | 0.68                 | 18.83       |
|                      |                          | <b>(0.12)</b> | <b>(0.15)</b>      | <b>(0.09)</b> | <b>(0.42)</b> | <b>(0.36)</b> |               | <b>(0.14)</b> |            | <b>(0.14)</b> |               |                      |             |
| P value              |                          | 2.7e-5        | <1e-10             | <1e-10        | 4.7e-7        | 8e-2          |               | 2.7e-5        |            | 3.5e-3        |               |                      |             |
| <b>ALL species</b>   |                          | <b>4.45</b>   | <b>-6.64</b>       | <b>7.55</b>   | <b>2.14</b>   | 0.45          | <b>-0.84</b>  | -0.26         |            | -0.1          |               | 0.67                 | 6.75        |
|                      |                          | <b>(0.1)</b>  | <b>(0.12)</b>      | <b>(0.12)</b> | <b>(0.4)</b>  | (0.28)        | <b>(0.29)</b> | (0.16)        |            | (0.14)        |               |                      |             |
| P value              |                          | <1e-10        | <1e-10             | <1e-10        | 6.5e-8        | 0.11          | 3.5e-3        | 0.11          |            | 0.45          |               |                      |             |

**Supplementary Table 3** | Regression coefficients (standard deviation) and p value of generalized least square regression results for leaf unfolding heat requirement ( $GDD_{req}$ ) for all sites.  $R^2$  and RMSE represent the coefficient of determination and the root mean square error of simulated versus observed leaf unfolding dates, respectively. Bold values indicate significant result with  $p < 0.1$ .

|                         | <b>NCD</b>            | <b>TG</b>            | <b>SWG</b>            | <b>LWG</b>            | <b>SWP</b>           | <b>LWP</b>           | <b>DL</b>            | <b>PG</b>            | <b>PP</b>            | <b>SMG</b>           | <b>SMP</b>    | <b><math>\alpha E</math></b> | <b>R2</b> | <b>RMSE</b> |
|-------------------------|-----------------------|----------------------|-----------------------|-----------------------|----------------------|----------------------|----------------------|----------------------|----------------------|----------------------|---------------|------------------------------|-----------|-------------|
| <i>A. hippocastanum</i> | <b>-56.5</b><br>(1)   | <b>54.5</b><br>(1.1) | <b>-14.9</b><br>(3.1) | -3.6<br>(2.3)         |                      | <b>8.3</b><br>(1.4)  | <b>57.6</b><br>(1.3) | <b>9.5</b><br>(2.8)  | <b>7.8</b><br>(1.6)  |                      |               |                              | 0.67      | 46.68       |
| P value                 | <1e-10                | <1e-10               | 1.6e-6                | 0.12                  |                      | 9.9e-9               | <1e-10               | 5.5e-4               | 1.9e-6               |                      |               |                              |           |             |
| <i>A. glutinosa</i>     | <b>-54.4</b><br>(1.3) | <b>48.1</b><br>(1.4) |                       | <b>-6.5</b><br>(2.3)  | <b>63</b><br>(1.6)   | <b>10.6</b><br>(1.9) |                      | <b>11.1</b><br>(2.8) | <b>5.2</b><br>(1.8)  |                      |               |                              | 0.49      | 98.9        |
| P value                 | <1e-10                | <1e-10               |                       | 5.9e-3                | <1e-10               | 1.3e-8               |                      | 9.2e-5               | 2.9e-3               |                      |               |                              |           |             |
| <i>B. pendula</i>       | <b>-47</b><br>(0.9)   | <b>56.9</b><br>(1)   |                       | <b>-8</b><br>(2.5)    | <b>53.3</b><br>(1.2) | 1.8<br>(1.4)         |                      |                      | <b>14.6</b><br>(1.2) |                      | -0.4<br>(1)   | -0.4<br>(1.4)                | 0.33      | 73.74       |
| P value                 | <1e-10                | <1e-10               |                       | 1.5e-3                | <1e-10               | 0.18                 |                      |                      | <1e-10               |                      | 0.65          | 0.75                         |           |             |
| <i>F. sylvatica</i>     | <b>-60.4</b><br>(1.2) | <b>63.5</b><br>(1.2) |                       | <b>-8.4</b><br>(3)    | <b>46.5</b><br>(1.5) | <b>7.2</b><br>(1.7)  |                      | <b>10.9</b><br>(2.9) | <b>10.1</b><br>(1.6) |                      |               | -1.1<br>(1.8)                | 0.44      | 83.44       |
| P value                 | <1e-10                | <1e-10               |                       | 5.2e-3                | <1e-10               | 2.1e-5               |                      | 1.7e-4               | 9.2e-10              |                      |               | 0.55                         |           |             |
| <i>F. excelsior</i>     | <b>-72.8</b><br>(1.5) | <b>48.3</b><br>(1.5) |                       | <b>-14</b><br>(2.7)   | <b>59.4</b><br>(2.1) | <b>19.2</b><br>(2.4) |                      | <b>13.3</b><br>(3)   | <b>8.4</b><br>(1.8)  | <b>-3.3</b><br>(1.9) |               |                              | 0.54      | 130.41      |
| P value                 | <1e-10                | <1e-10               |                       | 1.7e-7                | <1e-10               | <1e-10               |                      | 1.2e-5               | 6.4e-6               | 8.6e-2               |               |                              |           |             |
| <i>Q. robur</i>         | <b>-61</b><br>(1.2)   | <b>63.9</b><br>(1.3) | <b>-24.3</b><br>(4.4) | <b>-12.3</b><br>(3.2) | <b>63.2</b><br>(1.8) | <b>11.6</b><br>(2)   |                      | 5<br>(3.4)           | <b>12.8</b><br>(1.8) |                      |               | -0.6<br>(1.9)                | 0.55      | 75.32       |
| P value                 | <1e-10                | <1e-10               | 3.4e-8                | 9.8e-3                | <1e-10               | 3.6e-9               |                      | 0.14                 | <1e-10               |                      |               | 0.77                         |           |             |
| <i>S. aucuparia</i>     | <b>-59.6</b><br>(1.8) | <b>70.1</b><br>(1.7) | <b>-11.8</b><br>(4.8) | <b>-13.3</b><br>(3.5) |                      | <b>18.1</b><br>(2.6) | <b>54.7</b><br>(1.6) |                      | <b>8.2</b><br>(2)    |                      | -0.5<br>(2)   | 1.1<br>(2.8)                 | 0.73      | 72.56       |
| P value                 | <1e-10                | <1e-10               | 1.4e-2                | 1.4e-4                |                      | <1e-10               | <1e-10               |                      | 4.3e-5               |                      | 0.79          | 0.71                         |           |             |
| <i>T. cordata</i>       | <b>-16.8</b><br>(1.2) | <b>83.9</b><br>(1.2) |                       | <b>-10.4</b><br>(3.6) | <b>47.5</b><br>(1.4) | <b>36.4</b><br>(1.5) |                      | <b>8.6</b><br>(2.6)  | <b>9.1</b><br>(1.5)  |                      | -0.8<br>(1.4) |                              | 0.63      | 82.25       |
| P value                 | <1e-10                | <1e-10               |                       | 3.7e-3                | <1e-10               | <1e-10               |                      | 9.2e-4               | 7.3e-10              |                      | 0.56          |                              |           |             |
| <b>ALL species</b>      | <b>-51.8</b><br>(1)   | <b>60.4</b><br>(1)   |                       | <b>-4.6</b><br>(2.5)  | <b>83.6</b><br>(1.6) | 2.5<br>(1.8)         |                      | <b>12</b><br>(2.6)   | <b>9.3</b><br>(1.5)  |                      | -0.4<br>(1.1) | -0.5<br>(1.4)                | 0.48      | 93.94       |
| P value                 | <1e-10                | <1e-10               |                       | 6.2e-2                | <1e-10               | 0.15                 |                      | 2.5e-6               | 7.7e-10              |                      | 0.72          | 0.73                         |           |             |

**Supplementary Table 4** | Regression coefficients (standard deviation) and p value of generalized least square regression results for leaf unfolding dates for drought-prone sites. R<sup>2</sup> and RMSE represent the coefficient of determination and the root mean square error of simulated versus observed leaf unfolding dates, respectively. Bold values indicate significant result with p < 0.1.

|                         | <b>GDD<sub>req</sub></b> | <b>NCD</b>       | <b>TG</b>         | <b>TP</b>        | <b>SWG</b>        | <b>LWG</b>        | <b>PG</b>        | <b>PP</b>         | <b>SMG</b>      | <b>SMP</b> | <b>αE</b>        | <b>R<sup>2</sup></b> | <b>RMSE</b> |
|-------------------------|--------------------------|------------------|-------------------|------------------|-------------------|-------------------|------------------|-------------------|-----------------|------------|------------------|----------------------|-------------|
| <i>A. hippocastanum</i> |                          | <b>4.2 (0.2)</b> | <b>-3.8 (0.4)</b> | <b>4.2 (0.1)</b> |                   |                   | -0.1 (0.3)       | <b>-1.5 (0.3)</b> | 0 (0.3)         |            | -0.1 (0.2)       | 0.54                 | 9.63        |
| P value                 |                          | <1e-10           | <1e-10            | <1e-10           |                   |                   | 0.69             | 1.8e-8            | 0.87            |            | 0.63             |                      |             |
| <i>A. glutinosa</i>     |                          | <b>4.2 (0.2)</b> |                   | <b>4.4 (0.2)</b> | <b>1.8 (0.3)</b>  | <b>-1 (0.3)</b>   | <b>1.5 (0.3)</b> | <b>-1.5 (0.3)</b> | <b>-1 (0.2)</b> |            | <b>0.9 (0.2)</b> | 0.63                 | 4.61        |
| P value                 |                          | <1e-10           |                   | <1e-10           | <1e-10            | 1.0e-4            | 2.6e-7           | 1.4e-8            | 1.5e-6          |            | 1.7e-5           |                      |             |
| <i>B. pendula</i>       | <b>3.3 (0.1)</b>         | <b>4.5 (0.2)</b> | <b>-3.7 (0.3)</b> |                  |                   | 0 (0.6)           | 0.2 (0.3)        | <b>-1.3 (0.3)</b> | 0.4 (0.2)       |            | 0 (0.2)          | 0.55                 | 9.1         |
| P value                 | <1e-10                   | <1e-10           | <1e-10            |                  |                   | 0.95              | 0.51             | 7.1e-7            | 0.13            |            | 0.9              |                      |             |
| <i>F. sylvatica</i>     |                          | <b>3.9 (0.2)</b> | <b>-3.2 (0.3)</b> | <b>4.2 (0.2)</b> |                   | 0.7 (0.5)         | 0.4 (0.3)        | <b>-1.6 (0.2)</b> | -0.2 (0.2)      |            |                  | 0.58                 | 4.66        |
| P value                 |                          | <1e-10           | <1e-10            | <1e-10           |                   | 0.19              | 0.2              | 1.4e-10           | 0.36            |            |                  |                      |             |
| <i>F. excelsior</i>     |                          | <b>3.4 (0.2)</b> |                   | <b>4.4 (0.2)</b> | <b>-1.5 (0.8)</b> |                   | -0.3 (0.5)       |                   |                 | -0.3 (0.3) | <b>1 (0.3)</b>   | 0.67                 | 5.5         |
| P value                 |                          | <1e-10           |                   | <1e-10           | 4.9e-2            |                   | 0.58             |                   |                 | 0.27       | 1.5e-3           |                      |             |
| <i>Q. robur</i>         |                          | <b>3.9 (0.2)</b> | <b>-4.4 (0.3)</b> | <b>5.1 (0.1)</b> |                   | <b>1.8 (0.5)</b>  | 0.2 (0.3)        | <b>-1.1 (0.2)</b> | 0 (0.2)         |            |                  | 0.72                 | 6.53        |
| P value                 |                          | <1e-10           | <1e-10            | <1e-10           |                   | 6.7e-4            | 0.56             | 2.9e-7            | 0.96            |            |                  |                      |             |
| <i>S. aucuparia</i>     | <b>5.8 (0.2)</b>         | <b>3.4 (0.3)</b> |                   |                  | -1.3 (0.9)        |                   | <b>1.3 (0.5)</b> | -0.4 (0.3)        | -0.3 (0.3)      |            |                  | 0.33                 | 6.92        |
| P value                 | <1e-10                   | <1e-10           |                   |                  | 0.17              |                   | 3.5e-3           | 0.15              | 0.3             |            |                  |                      |             |
| <i>T. cordata</i>       |                          | <b>2.3 (0.7)</b> |                   | <b>4.4 (0.3)</b> |                   | <b>-4.6 (1.1)</b> |                  |                   |                 | 0.2 (0.7)  |                  | 0.55                 | 6.13        |
| P value                 |                          | 5.8e-4           |                   | <1e-10           |                   | 3.4e-5            |                  |                   |                 | 0.75       |                  |                      |             |
| <b>ALL species</b>      |                          | <b>4 (0.2)</b>   | <b>-4.7 (0.3)</b> | <b>6.5 (0.2)</b> |                   | 0.8 (0.6)         | 0 (0.3)          | <b>-1.6 (0.3)</b> | 0.1 (0.2)       |            | 0 (0.2)          | 0.68                 | 8.4         |
| P value                 |                          | <1e-10           | <1e-10            | <1e-10           |                   | 0.16              | 0.9              | 6.1e-10           | 0.8             |            | 0.95             |                      |             |

**Supplementary Table 5** | Regression coefficients (standard deviation) and p value of generalized least square regression results for leaf unfolding heat requirement ( $GDD_{req}$ ) for drought-prone sites.  $R^2$  and RMSE represent the coefficient of determination and the root mean square error of simulated versus observed leaf unfolding dates, respectively. Bold values indicate significant result with  $p < 0.1$ .

|                         | <b>NCD</b>            | <b>TG</b>            | <b>SWG</b>            | <b>LWG</b>            | <b>SWP</b>           | <b>LWP</b>           | <b>PG</b>             | <b>PP</b>            | <b>SMG</b>           | <b>SMP</b>          | <b><math>\alpha E</math></b> | <b><math>R^2</math></b> | <b>RMSe</b> |
|-------------------------|-----------------------|----------------------|-----------------------|-----------------------|----------------------|----------------------|-----------------------|----------------------|----------------------|---------------------|------------------------------|-------------------------|-------------|
| <i>A. hippocastanum</i> | <b>-48</b><br>(1.8)   |                      |                       | <b>-11.3</b><br>(1.6) | <b>29.2</b><br>(1.4) | <b>20.2</b><br>(1.5) | <b>-4.2</b><br>(1.6)  | -1.7<br>(1.7)        | <b>3.4</b><br>(1.2)  |                     | <b>-11.3</b><br>(1.2)        | 0.64                    | 34.37       |
| P value                 | <1e-10                |                      |                       | <1e-10                | <1e-10               | <1e-10               | 9e-3                  | 0.33                 | 7.2e-3               |                     | <1e-10                       |                         |             |
| <i>A. glutinosa</i>     | <b>-41.9</b><br>(1.8) |                      | <b>-14.4</b><br>(2.1) |                       | <b>44.1</b><br>(2.4) | <b>13.5</b><br>(2.4) | <b>-17.1</b><br>(2.4) | <b>6.3</b><br>(2.5)  |                      |                     | <b>-10.8</b><br>(1.8)        | 0.63                    | 40.13       |
| P value                 | <1e-10                |                      | <1e-10                |                       | <1e-10               | 1.8e-8               | <1e-10                | 1.2e-2               |                      |                     | 2.6e-9                       |                         |             |
| <i>B. pendula</i>       | <b>-33.3</b><br>(1.7) | <b>41.1</b><br>(2.6) |                       | -2.6<br>(5.5)         | <b>29.8</b><br>(1.6) | <b>9.8</b><br>(2.1)  | -3.8<br>(2.6)         | <b>10.7</b><br>(2.2) | <b>-4.4</b><br>(2.1) |                     | -1.3<br>(2.1)                | 0.27                    | 82.09       |
| P value                 | <1e-10                | <1e-10               |                       | 0.64                  | <1e-10               | 5.0e-6               | 0.14                  | 1.0e-6               | 4.1e-2               |                     | 0.53                         |                         |             |
| <i>F. sylvatica</i>     | <b>-48.9</b><br>(1.9) | <b>48.2</b><br>(2.9) |                       | <b>-17.2</b><br>(5.7) | <b>29.2</b><br>(1.9) | <b>15.9</b><br>(2.5) | 0.1<br>(3.3)          | <b>15.4</b><br>(2.5) |                      | <b>-4.1</b><br>(2)  | 1.1<br>(2.2)                 | 0.58                    | 88.49       |
| P value                 | <1e-10                | <1e-10               |                       | 2.8e-3                | <1e-10               | 3.5e-10              | 0.98                  | 1.0e-9               |                      | 4.6e-2              | 0.63                         |                         |             |
| <i>F. excelsior</i>     | <b>-44.6</b><br>(2.6) | <b>38.8</b><br>(4.5) |                       |                       | <b>40.6</b><br>(3.1) | <b>38.2</b><br>(4.2) | <b>-10.7</b><br>(4.8) | <b>22.3</b><br>(3.4) |                      | <b>4.3</b><br>(2.7) | -0.9<br>(2.8)                | 0.52                    | 215.3       |
| P value                 | <1e-10                | <1e-10               |                       |                       | <1e-10               | <1e-10               | 2.6e-2                | 1.1e-10              |                      | 0.11                | 0.76                         |                         |             |
| <i>Q. robur</i>         | <b>-44.7</b><br>(2.2) | <b>56.9</b><br>(2.8) |                       |                       | <b>36.5</b><br>(2.8) | <b>29.1</b><br>(3.2) | <b>-9.7</b><br>(2.8)  | <b>13.8</b><br>(2.4) | 0.2<br>(2.1)         |                     | 0<br>(2)                     | 0.48                    | 97.49       |
| P value                 | <1e-10                | <1e-10               |                       |                       | <1e-10               | <1e-10               | 5.5e-4                | 1.9e-8               | 0.94                 |                     | 0.98                         |                         |             |
| <i>S. aucuparia</i>     | <b>-16.6</b><br>(1.9) | <b>59.6</b><br>(3.1) |                       |                       | <b>43.8</b><br>(1.7) | <b>16.7</b><br>(2.8) | -1.5<br>(2.8)         | 2.9<br>(2.4)         | 2.5<br>(1.9)         |                     |                              | 0.48                    | 74.38       |
| P value                 | <1e-10                | <1e-10               |                       |                       | <1e-10               | 4.3e-9               | 0.60                  | 0.22                 | 0.19                 |                     |                              |                         |             |
| <i>T. cordata</i>       | <b>-34.3</b><br>(5)   | <b>50.2</b><br>(5)   |                       |                       | <b>20</b><br>(3.1)   | <b>61.2</b><br>(4.1) |                       | <b>-22.9</b><br>(3)  | -4.9<br>(3.3)        |                     | <b>9.1</b><br>(3.5)          | 0.72                    | 42.06       |
| P value                 | <1e-10                | <1e-10               |                       |                       | 5.1e-10              | <1e-10               |                       | <1e-10               | 0.14                 |                     | 1.0e-2                       |                         |             |
| <b>ALL species</b>      | <b>-39.4</b><br>(1.8) | <b>48.2</b><br>(2.4) |                       |                       | <b>58.1</b><br>(2.2) | <b>16</b><br>(2.7)   | -0.4<br>(2.6)         | <b>11.5</b><br>(2.2) |                      | -2.2<br>(1.7)       | -1.3<br>(1.9)                | 0.56                    | 150.95      |
| P value                 | <1e-10                | <1e-10               |                       |                       | <1e-10               | 4.5e-9               | 0.88                  | 2.2e-7               |                      | 0.21                | 0.50                         |                         |             |

**Supplementary Table 6** | Regression coefficients (standard deviation) and p value of generalized least square regression results for leaf unfolding dates for wet sites. R<sup>2</sup> and RMSE represent the coefficient of determination and the root mean square error of simulated versus observed leaf unfolding dates, respectively. Bold values indicate significant result with p < 0.1.

|                         | <b>GDD<sub>req</sub></b> | <b>NCD</b>         | <b>TG</b>           | <b>TP</b>          | <b>SWG</b>         | <b>LWG</b>   | <b>PG</b>           | <b>PP</b>           | <b>SMP</b>          | <b><math>\alpha</math>E</b> | <b>R2</b> | <b>RMSE</b> |
|-------------------------|--------------------------|--------------------|---------------------|--------------------|--------------------|--------------|---------------------|---------------------|---------------------|-----------------------------|-----------|-------------|
| <i>A. hippocastanum</i> |                          | <b>4.6 ( 0.1 )</b> | <b>-6.5 ( 0.1 )</b> | <b>6 ( 0.1 )</b>   | <b>2.1 ( 0.4 )</b> | -0.1 ( 0.3 ) | <b>-1.1 ( 0.3 )</b> | 0.1 ( 0.2 )         | 0 ( 0.2 )           |                             | 0.5       | 7.82        |
| P value                 |                          | <1e-10             | <1e-10              | <1e-10             | 2.2e-6             | 0.8          | 1.1e-3              | 0.78                | 0.84                |                             |           |             |
| <i>A. glutinosa</i>     | <b>6.8 ( 0.1 )</b>       | <b>5.9 ( 0.1 )</b> | <b>-4.7 ( 0.2 )</b> |                    | <b>1.3 ( 0.5 )</b> | 0.2 ( 0.3 )  |                     | 0.3 ( 0.2 )         | 0 ( 0.2 )           |                             | 0.63      | 5.59        |
| P value                 | <1e-10                   | <1e-10             | <1e-10              |                    | 3.3e-3             | 0.56         |                     | 0.12                | 0.82                |                             |           |             |
| <i>B. pendula</i>       | <b>5.5 ( 0.1 )</b>       | <b>5.3 ( 0.1 )</b> | <b>-5.9 ( 0.1 )</b> |                    | <b>1.9 ( 0.4 )</b> | -0.4 ( 0.3 ) | <b>-1.4 ( 0.3 )</b> | <b>0.4 ( 0.2 )</b>  | 0 ( 0.2 )           | 0.2 ( 0.1 )                 | 0.53      | 5.89        |
| P value                 | <1e-10                   | <1e-10             | <1e-10              |                    | 1.1e-5             | 0.24         | 9.0e-5              | 5.1e-2              | 0.95                | 0.3                         |           |             |
| <i>F. sylvatica</i>     | <b>5.7 ( 0.1 )</b>       | <b>5.1 ( 0.1 )</b> | <b>-5 ( 0.1 )</b>   |                    | <b>1.2 ( 0.4 )</b> | -0.1 ( 0.3 ) | <b>-1.1 ( 0.3 )</b> | <b>0.4 ( 0.2 )</b>  | 0.1 ( 0.1 )         |                             | 0.48      | 7.72        |
| P value                 | <1e-10                   | <1e-10             | <1e-10              |                    | 3.0e-3             | 0.81         | 3.3e-4              | 8.5e-3              | 0.35                |                             |           |             |
| <i>F. excelsior</i>     |                          | <b>4.9 ( 0.1 )</b> | <b>-3.9 ( 0.1 )</b> | <b>5.8 ( 0.1 )</b> | <b>0.9 ( 0.4 )</b> |              | -0.4 ( 0.2 )        |                     | 0 ( 0.2 )           |                             | 0.63      | 13.36       |
| P value                 |                          | <1e-10             | <1e-10              | <1e-10             | 4.9e-2             |              | 0.14                |                     | 0.84                |                             |           |             |
| <i>Q. robur</i>         |                          | <b>4.5 ( 0.1 )</b> | <b>-5 ( 0.1 )</b>   | <b>5.3 ( 0.1 )</b> | <b>1.4 ( 0.4 )</b> | -0.2 ( 0.3 ) |                     | <b>0.4 ( 0.1 )</b>  | 0.1 ( 0.1 )         | 0.1 ( 0.1 )                 | 0.66      | 5.15        |
| P value                 |                          | <1e-10             | <1e-10              | <1e-10             | 2.6e-4             | 0.55         |                     | 3.6e-3              | 0.48                | 0.71                        |           |             |
| <i>S. aucuparia</i>     | <b>8.4 ( 0.2 )</b>       | <b>4.5 ( 0.2 )</b> | <b>-5.8 ( 0.2 )</b> |                    | <b>2.2 ( 0.5 )</b> | 0.6 ( 0.4 )  |                     |                     |                     |                             | 0.52      | 5.42        |
| P value                 | <1e-10                   | <1e-10             | <1e-10              |                    | 1.1e-4             | 0.13         |                     |                     |                     |                             |           |             |
| <i>T. cordata</i>       |                          | <b>0.5 ( 0.1 )</b> | <b>-7.4 ( 0.1 )</b> | <b>6.4 ( 0.1 )</b> | <b>2.2 ( 0.5 )</b> | -0.5 ( 0.4 ) | -0.4 ( 0.3 )        | <b>-0.5 ( 0.2 )</b> | <b>-0.3 ( 0.2 )</b> | <b>0.4 ( 0.2 )</b>          | 0.66      | 18.93       |
| P value                 |                          | 5.1e-5             | <1e-10              | <1e-10             | 2.0e-6             | 0.19         | 0.18                | 2.0e-3              | 5.6e-2              | 4.5e-3                      |           |             |
| <b>ALL species</b>      |                          | <b>4.5 ( 0.1 )</b> | <b>-6.7 ( 0.1 )</b> | <b>7.7 ( 0.1 )</b> | <b>2.2 ( 0.5 )</b> | 0.2 ( 0.3 )  | <b>-1.3 ( 0.3 )</b> | 0.2 ( 0.2 )         | -0.1 ( 0.2 )        |                             | 0.66      | 6.68        |
| P value                 |                          | <1e-10             | <1e-10              | <1e-10             | 1.803E-06          | 0.49         | 1.3e-4              | 0.34                | 0.42                |                             |           |             |



**Supplementary Table 7** | Regression coefficients (standard deviation) and p value of generalized least square regression results for leaf unfolding heat requirement ( $GDD_{req}$ ) for wet sites.  $R^2$  and RMSE represent the coefficient of determination and the root mean square error of simulated versus observed leaf unfolding dates, respectively. Bold values indicate significant result with  $p < 0.1$ .

|                         | <b>NCD</b>           | <b>TG</b>           | <b>LWG</b>           | <b>SWP</b>          | <b>LWP</b>          | <b>DL</b>           | <b>PG</b>           | <b>PP</b>           | <b>SMG</b>          | <b>SMP</b>         | <b><math>\alpha E</math></b> | <b><math>R^2</math></b> | <b>RMSE</b> |
|-------------------------|----------------------|---------------------|----------------------|---------------------|---------------------|---------------------|---------------------|---------------------|---------------------|--------------------|------------------------------|-------------------------|-------------|
| <i>A. hippocastanum</i> | <b>-56.9 ( 1 )</b>   | <b>53 ( 1 )</b>     | <b>-16.3 ( 0.8 )</b> |                     | <b>21 ( 1.2 )</b>   | <b>47.3 ( 1.2 )</b> | <b>-9.6 ( 1.4 )</b> | <b>20.5 ( 1.3 )</b> |                     |                    | <b>6 ( 0.9 )</b>             | 0.72                    | 45.08       |
| P value                 | <1e-10               | <1e-10              | <1e-10               |                     | <1e-10              | <1e-10              | <1e-10              | <1e-10              |                     |                    | <1e-10                       |                         |             |
| <i>A. glutinosa</i>     | <b>-57.1 ( 1.5 )</b> | <b>49.1 ( 1.6 )</b> | <b>-2.9 ( 3 )</b>    | <b>67.7 ( 1.9 )</b> | <b>8.5 ( 2.2 )</b>  |                     |                     | <b>6 ( 1.7 )</b>    |                     |                    | 1.9 ( 1.8 )                  | 0.52                    | 73.75       |
| P value                 | <1e-10               | <1e-10              | 0.33                 | <1e-10              | 1.1e-4              |                     |                     | 2.8e-4              |                     |                    | 0.28                         |                         |             |
| <i>B. pendula</i>       | <b>-45.2 ( 0.9 )</b> | <b>44.5 ( 1 )</b>   | <b>-21 ( 0.8 )</b>   | <b>13.5 ( 0.9 )</b> | <b>40.3 ( 0.9 )</b> |                     |                     | <b>11.3 ( 0.9 )</b> |                     |                    |                              | 0.7                     | 46.86       |
| P value                 | <1e-10               | <1e-10              | <1e-10               | <1e-10              | <1e-10              |                     |                     | <1e-10              |                     |                    |                              |                         |             |
| <i>F. sylvatica</i>     | <b>-62.2 ( 1.4 )</b> | <b>65 ( 1.3 )</b>   | <b>-6.2 ( 3.4 )</b>  | <b>49.2 ( 1.8 )</b> | <b>5.4 ( 2 )</b>    |                     | <b>12.5 ( 3.4 )</b> | <b>8.4 ( 1.9 )</b>  |                     |                    |                              | 0.42                    | 89.2        |
| P value                 | <1e-10               | <1e-10              | 7.1e-2               | <1e-10              | 7.8e-3              |                     | 2.7e-4              | 8.6e-6              |                     |                    |                              |                         |             |
| <i>F. excelsior</i>     | <b>-78.1 ( 1.7 )</b> | <b>48.9 ( 1.8 )</b> | <b>-9 ( 3.5 )</b>    | <b>59.9 ( 2.3 )</b> | <b>17.2 ( 2.7 )</b> |                     |                     | <b>6.2 ( 1.8 )</b>  | <b>-2.3 ( 2.8 )</b> |                    | <b>3.7 ( 2.1 )</b>           | 0.59                    | 165.72      |
| P value                 | <1e-10               | <1e-10              | 1.1e-2               | <1e-10              | 1.5e-10             |                     |                     | 4.7e-4              | 0.42                |                    | 7.4e-2                       |                         |             |
| <i>Q. robur</i>         | <b>-64.1 ( 1.4 )</b> | <b>63 ( 1.4 )</b>   | <b>-9.6 ( 3.6 )</b>  | <b>64.2 ( 2.2 )</b> | <b>10.7 ( 2.3 )</b> |                     | <b>11.7 ( 3.6 )</b> | <b>9.3 ( 2 )</b>    |                     |                    |                              | 0.38                    | 87.38       |
| P value                 | <1e-10               | <1e-10              | 8.4e-3               | <1e-10              | 4.6e-3              |                     | 1.4e-3              | 5.4e-6              |                     |                    |                              |                         |             |
| <i>S. aucuparia</i>     | <b>-67.4 ( 2.3 )</b> | <b>69.8 ( 1.9 )</b> | <b>-16.9 ( 5 )</b>   |                     | <b>16.2 ( 3.4 )</b> | <b>57.6 ( 2.1 )</b> |                     | <b>7.7 ( 2.3 )</b>  |                     |                    | <b>4.9 ( 2.5 )</b>           | 0.78                    | 80.06       |
| P value                 | <1e-10               | <1e-10              | 7.8e-4               |                     | 2.0e-6              | <1e-10              |                     | 8.4e-4              |                     |                    | 4.9e-2                       |                         |             |
| <i>T. cordata</i>       | <b>-15.5 ( 1.1 )</b> | <b>80.4 ( 1.2 )</b> | <b>-6.6 ( 3.5 )</b>  | <b>47.7 ( 1.4 )</b> | <b>34.6 ( 1.6 )</b> |                     |                     | <b>11.9 ( 1.3 )</b> |                     | <b>0.5 ( 1.5 )</b> | <b>-2.8 ( 1.5 )</b>          | 0.66                    | 96.62       |
| P value                 | <1e-10               | <1e-10              | 5.7e-3               | <1e-10              | <1e-10              |                     |                     | <1e-10              |                     | 0.74               | 5.6e-2                       |                         |             |
| <b>ALL species</b>      | <b>-48.4 ( 0.9 )</b> | <b>49 ( 1 )</b>     | <b>-19.2 ( 0.8 )</b> | <b>29.9 ( 1.1 )</b> | <b>51.4 ( 1.1 )</b> |                     |                     | <b>6.9 ( 1 )</b>    |                     |                    | <b>1.7 ( 1 )</b>             | 0.73                    | 72.87       |
| P value                 | <1e-10               | <1e-10              | <1e-10               | <1e-10              | 0                   |                     |                     | <1e-10              |                     |                    | 9.5e-2                       |                         |             |

**Supplementary Table 8** | Coefficients, RMSE and R<sup>2</sup> of the elastic-net regressions performed against leaf unfolding date observations for each species. Alpha and lambda are the two regularization coefficients of the elastic net regression. VIF selection and spatial auto-correlation corrections were not applied yet here.

| Species                 | Model coefficients |      |       |      |      |       |      |       |      |       |            | Regularization coefficients |       | RMSE | R <sup>2</sup> |
|-------------------------|--------------------|------|-------|------|------|-------|------|-------|------|-------|------------|-----------------------------|-------|------|----------------|
|                         | GDD <sub>req</sub> | NCD  | TG    | PG   | SWG  | LWG   | TP   | PP    | SMP  | SMG   | $\alpha E$ | lambda                      | alpha |      |                |
| <i>A. hippocastanum</i> | 5.37               | 5.43 | -5.84 | 0.48 | 3.08 | 1.06  | 0.00 | -1.50 | 0.23 | -0.19 | -0.25      | 0.13                        | 0.75  | 4.48 | 0.72           |
| <i>A. glutinosa</i>     | 5.24               | 5.27 | -4.63 | 0.00 | 2.48 | 0.41  | 0.76 | -0.78 | 0.05 | 0.00  | 0.00       | 0.25                        | 0.55  | 4.98 | 0.67           |
| <i>B. pendula</i>       | 4.33               | 4.53 | -5.39 | 0.85 | 2.64 | 0.52  | 0.00 | -1.47 | 0.83 | -0.95 | -0.41      | 0.14                        | 0.35  | 4.36 | 0.67           |
| <i>F. sylvatica</i>     | 2.60               | 3.98 | -4.81 | 0.49 | 2.09 | 0.42  | 2.10 | -1.05 | 0.43 | -0.36 | -0.07      | 0.19                        | 0.15  | 4.16 | 0.59           |
| <i>F. excelsior</i>     | 1.06               | 4.39 | -3.80 | 0.03 | 1.57 | 0.00  | 3.94 | 0.00  | 0.07 | 0.00  | 0.55       | 0.18                        | 0.75  | 4.22 | 0.69           |
| <i>Q. robur</i>         | 2.18               | 4.80 | -5.06 | 0.08 | 2.46 | 0.49  | 3.08 | -0.63 | 0.24 | -0.07 | 0.00       | 0.19                        | 0.35  | 4.13 | 0.73           |
| <i>T. cordata</i>       | 5.45               | 4.33 | -5.03 | 0.00 | 2.46 | 1.32  | 0.00 | -0.19 | 0.29 | -0.37 | -0.09      | 0.21                        | 0.30  | 4.65 | 0.62           |
| <i>S. aucuparia</i>     | 3.92               | 2.51 | -6.38 | 0.00 | 2.41 | -0.52 | 1.40 | -0.90 | 0.05 | 0.00  | 0.00       | 0.16                        | 0.65  | 3.74 | 0.76           |
| <b>ALL species</b>      | 7.47               | 6.27 | -5.72 | 0.36 | 3.00 | 0.96  | 1.39 | -1.05 | 0.13 | 0.00  | 0.00       | 0.12                        | 0.60  | 5.02 | 0.77           |

**Supplementary Table 9** | Coefficients, RMSE and R<sup>2</sup> of the elastic-net regressions performed against growing degree days (GDD<sub>req</sub>) estimations for each species. Alpha and lambda are the two regularization coefficients of the elastic net regression. VIF selection and spatial auto-correlation corrections were not yet applied here.

| Species                 | Model coefficients |       |       |        |        |       |       |       |       |       |       |            | Regularization coefficients |       | RMSE  | R <sup>2</sup> |
|-------------------------|--------------------|-------|-------|--------|--------|-------|-------|-------|-------|-------|-------|------------|-----------------------------|-------|-------|----------------|
|                         | NCD                | TG    | PG    | SWG    | LWG    | PP    | SWP   | LWP   | DL    | SMP   | SMG   | $\alpha$ E | lambda                      | alpha |       |                |
| <i>A. hippocastanum</i> | -49.35             | 48.60 | -2.96 | -16.63 | -14.13 | 11.86 | 17.97 | 18.25 | 24.28 | 0.00  | 0.00  | 0.00       | 4.04                        | 0.20  | 42.41 | 0.73           |
| <i>A. glutinosa</i>     | -52.03             | 45.28 | -1.13 | -16.52 | -7.65  | 9.75  | 23.96 | 17.96 | 26.14 | 0.00  | 0.00  | 0.00       | 4.04                        | 0.30  | 48.69 | 0.71           |
| <i>B. pendula</i>       | -45.66             | 49.21 | -5.53 | -18.71 | -17.08 | 17.71 | 17.58 | 18.30 | 15.80 | -1.82 | 0.00  | -1.31      | 3.11                        | 0.10  | 40.43 | 0.73           |
| <i>F. sylvatica</i>     | -58.46             | 60.83 | -4.98 | -25.25 | -18.11 | 14.67 | 16.63 | 18.40 | 18.08 | 0.00  | 0.00  | -0.81      | 2.65                        | 0.40  | 46.23 | 0.79           |
| <i>F. excelsior</i>     | -69.79             | 48.61 | -0.78 | -15.21 | -7.53  | 9.66  | 20.29 | 22.88 | 29.74 | -0.29 | -0.02 | 0.00       | 2.25                        | 0.85  | 54.89 | 0.74           |
| <i>Q. robur</i>         | -57.73             | 57.76 | -9.50 | -22.32 | -17.93 | 14.71 | 26.84 | 23.42 | 23.23 | 0.00  | 0.00  | -0.22      | 3.79                        | 0.30  | 49.80 | 0.74           |
| <i>T. cordata</i>       | -76.28             | 60.33 | -3.55 | -4.83  | -27.81 | 14.08 | 13.84 | 16.50 | 34.81 | -0.53 | 0.00  | 5.81       | 11.19                       | 0.10  | 63.38 | 0.78           |
| <i>S. aucuparia</i>     | -26.42             | 73.26 | 4.46  | -29.16 | -4.77  | 6.14  | 35.54 | 36.11 | 9.29  | -4.63 | 3.79  | 0.00       | 1.31                        | 0.55  | 35.15 | 0.82           |
| <b>ALL species</b>      | -63.50             | 60.17 | -8.77 | -28.22 | -17.61 | 17.26 | 45.00 | 19.35 | 34.93 | -1.62 | 0.00  | -0.43      | 2.85                        | 0.20  | 52.00 | 0.80           |

**Supplementary Table 10** | Akaike index criterion (AIC) estimated for each generalized least square regression with spatial auto-correlation correction (with different residual structures: exponential, Gaussian, linear, rational quadratic and spherical) for the estimation of leaf unfolding dates and corresponding heat requirement. Minimum AIC are in bold.

| LU               | No correction | Exponential  | Gaussian | Linear       | Rational quadratic | Spherical    |
|------------------|---------------|--------------|----------|--------------|--------------------|--------------|
| A. hippocastanum | 25502         | 25425        | 25506    | 25506        | <b>24613</b>       | 25506        |
| A. glutinosa     | 19129         | <b>18771</b> | 19126    | 19124        | 18782              | <b>18772</b> |
| B. pendula       | 26088         | 25986        | 26092    | <b>25130</b> | 25199              | 26092        |
| F.sylvatica      | 22370         | 22313        | 21888    | <b>21803</b> | 21855              | <b>21803</b> |
| F. excelsior     | 16971         | <b>16612</b> | 16667    | 16970        | 16645              | <b>16611</b> |
| Q. robur         | 22461         | <b>21897</b> | 21961    | 22457        | 21935              | <b>21897</b> |
| T. cordata       | 13417         | <b>12701</b> | 12749    | <b>12701</b> | 12718              | 13421        |
| S. aucuparia     | 12670         | <b>11791</b> | 12674    | 12674        | 11856              | 12674        |
| ALL species      | 29070         | 29070        | 27728    | <b>27613</b> | 27674              | <b>27613</b> |
| <b>GDDreq</b>    |               |              |          |              |                    |              |
| A. hippocastanum | 45194         | 45193        | 45196    | 45196        | <b>44634</b>       | 45196        |
| A. glutinosa     | 34039         | <b>33204</b> | 34042    | 34042        | 33230              | 34042        |
| B. pendula       | 46754         | 46712        | 45436    | 46758        | <b>45388</b>       | 46756        |
| F.sylvatica      | 41974         | 41822        | 40727    | <b>40645</b> | 40690              | <b>40645</b> |
| F. excelsior     | 32402         | 32320        | 32403    | 32403        | <b>31646</b>       | 32403        |
| Q. robur         | 41858         | 41848        | 41862    | 41860        | <b>41461</b>       | 41862        |
| T. cordata       | 25168         | <b>23763</b> | 23782    | 25160        | <b>23758</b>       | 25172        |
| S. aucuparia     | 23035         | <b>21802</b> | 21874    | 23030        | 21832              | <b>21802</b> |
| ALL species      | 50522         | 50522        | 50523    | 50524        | <b>49094</b>       | 50522        |
